# Supplementary material for: Water chemistry and greenhouse gas concentrations in waterbodies of a thawing permafrost peatland complex in northern Norway
Source: Copernicus journal article supplement (doi:10.5194/egusphere-2025-184), 2025-01-29
Supplement: Supplementary file 1 [file egusphere-2025-184-supplement.pdf]

# 1 List of Figures and Tables for SI

2 Figure SI 1 Spatial variability in water pH (a) and conductivity (b) in September 2023 across the  
3 wetland, water bodies of the peat plateau and saturated surroundings. Spatial variability in  
4 relative importance of CH<sub>4</sub> global warming potential (GWP) compared to total global warming  
5 on a 20-year (c) or 100-year (d) horizon.

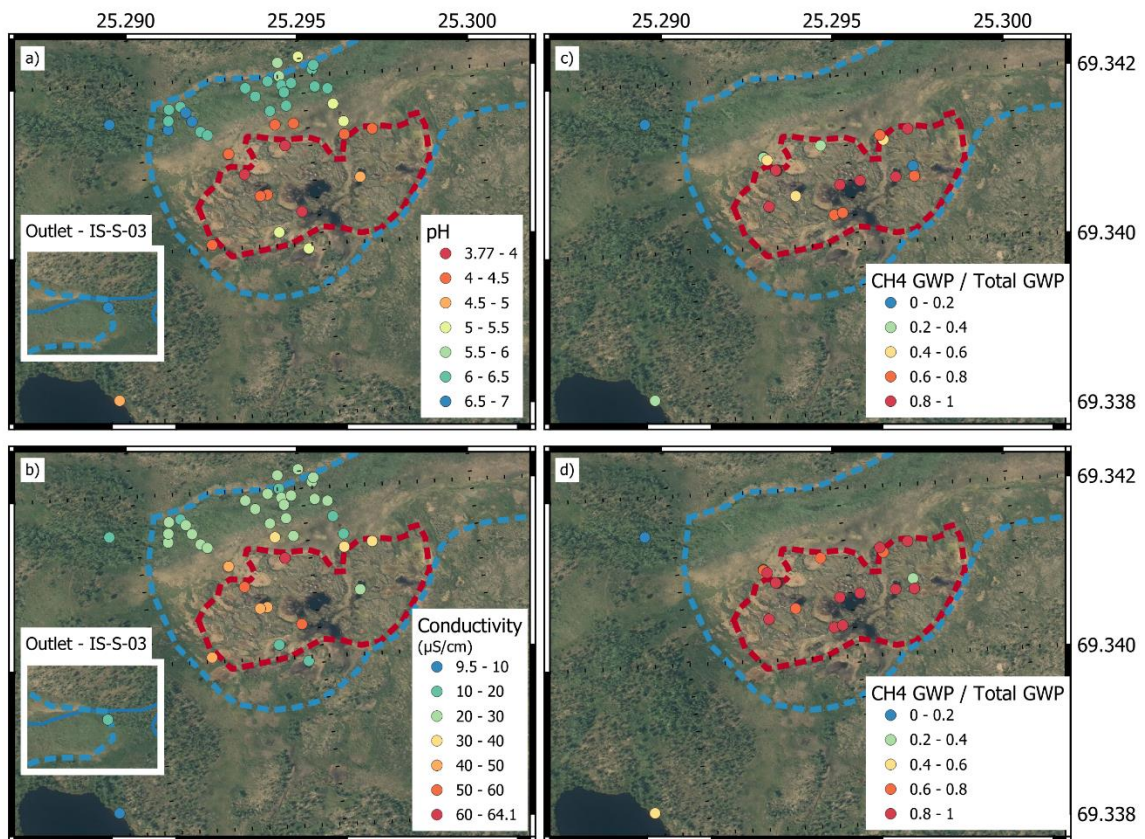

6

7 Table SI 1 Temperature and thaw/freeze dates in 2022 from sensor data in the ponds and  
 8 streams

|           | Ice-off date | Average T °C | Max T °C | Max T date | Ice-on date | Days to max T | Days ice-free |
|-----------|--------------|--------------|----------|------------|-------------|---------------|---------------|
| TK-POND 1 | 15/05/22     | 8.6          | 17.7     | 29/06/22   | 03/11/22    | 45            | 172           |
| TK-POND 2 | 20/05/22     | 8.1          | 14.8     | 05/07/22   | 01/11/22    | 46            | 165           |
| TK-POND 3 | 18/05/22     | 8.4          | 15.4     | 05/07/22   | 03/11/22    | 48            | 169           |
| TK-DRAIN  | 14/05/22     | 9.4          | 22.0     | 29/06/22   | 26/10/22    | 46            | 165           |
| INLET     | 20/05/22     | 7.3          | 14.5     | 02/07/22   | 07/11/22    | 43            | 171           |
| OUTLET    | 14/05/22     | 7.7          | 17.4     | 03/07/22   | 14/11/22    | 50            | 184           |

9

10 Table SI 2 Flux and mineralization rates during the ice-free period. CO<sub>2</sub> flux values are reported  
 11 in **g C/m<sup>2</sup>** while DIC mineralization rates are reported in **g C/m<sup>3</sup>/year**. These values represent  
 12 the annual CO<sub>2</sub> flux and total DOM mineralization during the active, ice-free portion of the year.

| flux and mineralization rates during ice free | CO2 flux g C/m <sup>2</sup> /yr | stdev | DIC rate g C/m <sup>3</sup> /yr | stdev |
|-----------------------------------------------|---------------------------------|-------|---------------------------------|-------|
| TK-Pond 1                                     | 61.2                            | 47.6  | 116.9                           | 60.0  |
| TK-Pond 2                                     | 51.0                            | 37.4  | 151.0                           | 173.1 |
| TK-Pond 3                                     | 86.7                            | 47.6  | 156.5                           | 148.5 |
| TK-Drain                                      | 62.9                            | 25.5  | 25.5                            | 26.5  |
| Inlet                                         | 190.4                           | 78.2  | 82.2                            | 49.3  |
| Outlet                                        | 404.8                           | 211.6 | 89.7                            | 73.1  |

13

14 Table SI 3 Sampling of cations (calcium: Ca; magnesium: Mg; Potassium: K; and Sodium: Na) in  
 15 autumn 2020 and summer 2021

| site      | date       | Ca   | Mg    | K     | Na   | Cl    |
|-----------|------------|------|-------|-------|------|-------|
| TK-Pond 1 | 2020-09-07 | 0.64 | 0.26  | 0.02  | 0.91 | 1.27  |
| TK-Pond 1 | 2021-06-03 | 0.48 | 0.27  | 0.046 | 0.81 | 0.37  |
| TK-Pond 1 | 2021-06-30 | 0.45 | 0.27  | 0.035 | 0.34 | 0.087 |
| TK-Pond 2 | 2020-09-07 | 0.65 | 0.29  | 0.01  | 0.41 | 0.8   |
| TK-Pond 2 | 2021-06-03 | 0.21 | 0.11  | 0.017 | 0.46 | 0.43  |
| TK-Pond 2 | 2021-07-01 | 0.41 | 0.24  | 0.01  | 0.52 | 0.36  |
| TK-Pond 3 | 2020-09-07 | 0.22 | 0.064 | 0.022 | 0.16 | 0.52  |
| TK-Pond 3 | 2021-06-03 | 0.32 | 0.2   | 0.72  | 0.99 | 0.46  |
| TK-Pond 3 | 2021-06-30 | 0.32 | 0.21  | 0.057 | 0.57 | 0.34  |
| TK-Drain  | 2020-09-07 | 0.57 | 0.27  | 0.026 | 0.85 | 0.83  |
| TK-Drain  | 2021-06-03 | 0.4  | 0.19  | 0.018 | 0.65 | 0.39  |

|          |            |      |      |       |      |      |
|----------|------------|------|------|-------|------|------|
| TK-Drain | 2021-07-01 | 0.47 | 0.26 | 0.1   | 0.65 | 0.43 |
| Inlet    | 2020-09-07 | 2.18 | 1.05 | 0.49  | 1.44 | 0.92 |
| Inlet    | 2021-06-02 | 1.17 | 0.54 | 0.59  | 0.9  | 0.49 |
| Inlet    | 2021-06-30 | 2.26 | 1.02 | 0.26  | 1.41 | 0.4  |
| Outlet   | 2020-09-07 | 1.96 | 0.9  | 0.6   | 1.41 | 1.01 |
| Outlet   | 2021-06-03 | 1.07 | 0.54 | 0.79  | 0.82 | 0.48 |
| Outlet   | 2021-06-30 | 1.63 | 0.78 | 0.029 | 1.33 | 0.25 |

16

17

18
